# Supplementary material for: A Novel Potassium Channel in Photosynthetic Cyanobacteria
Source: PubMed Central journal article supplement (PMC2853561; doi:10.1371/journal.pone.0010118), 2010-04-12
Supplement: pone.0010118.s009.pdf [file pone.0010118.s009.pdf]

Cedric Notredame

CPU TIME:0 sec.

SCORE=63

\*

**BAD** **AVG** **GOOD**

\*

gi | 1001732 | dbj | : 63  
At4g18160 : 63  
cons : 63

gi | 1001732 | dbj | **SynK** -----  
At4g18160 **TPK3** MANEGSDPLLQYMISPRLKKPPQLLFPLPEDNEVAIPMPMPSEF

cons

gi | 1001732 | dbj | ---MFGKYRQKNLDNWHYRNLFWISIVLLFFFTMFVKTRMGGTIT  
At4g18160 KERLI FGPFSCSPRDS SHFIDSMKQPS-----PSSSST

cons

: \* \* : . \* . \* : : : : . \* . . . \*

gi | 1001732 | dbj | SILFTVTILVMVKN-MAISLWK-----  
At4g18160 -----AVNNPFSDSSTLDP LLPPPPPQPEPWLSDQTSSHC

cons

\* : \* : : \* \* .

gi | 1001732 | dbj | --TFLR--GLVAIALGCDLLT-LLISNPTISQRLFTWADIVYAV  
At4g18160 QGHALHRSKTAPAMAVINDLHHP IRQKDPTETSRS-----

cons

: : \* \* : \* : \* : \* : \* : \*

gi | 1001732 | dbj | FFGAAVITISQQLNKVQKVDQNALLGAI SVYLLIGVFWFLYRIS  
At4g18160 -----VVR-QAFALLVVYLSLGVLIYWLNRDH

cons

\* : : . : \* \* : \* \* : \* \*

gi | 1001732 | dbj | YIISPTNFNELQSDGINNFILLYFSFTTLTTLGYGDITPTDSIAM  
At4g18160 YVVNQTHP---VVDG-----LYFCIVTMCTIGYGDITPNSVVTK

cons

\* : : \* : \* \* \* : \* : \* \* \* \* \* : : \*

gi | 1001732 | dbj | GLSNMEAIVGQMYSVIFVARLVSLYTTDLNCHS-----  
At4g18160 LFSIMFVLVGFQFIDILLSGMVS-YVLDLQESYMLDSAKRRDEPE

cons

: \* \* . : \* \* : \* : : : \* \* \* . \* \* :

gi | 1001732 | dbj | -----  
At4g18160 KRRSYIIDVKKGRMRIRLKVVALALGVVVLCAVGVGIMHFIEEIG

cons

gi|1001732|dbj| -----  
At4g18160 WLDSFYLSVMSVTTVGYGDRAFKTLPGRLEFAAIWLLVSTLAVARA

cons

gi|1001732|dbj| -----  
At4g18160 FLYLAEARVDKRNREKAKVLCETMSVSQFFAADIDNNGCVSKAE

cons

gi|1001732|dbj| ----- QIREEQE  
At4g18160 YVIYKLEMEKITDKDILPISKQFDKLDRCSTNGKITLL DLLEGGSS

cons

: : \* .

gi|1001732|dbj| SD  
At4g18160 GD

cons . \*
