# Supplementary material for: A Novel Potassium Channel in Photosynthetic Cyanobacteria
Source: PubMed Central journal article supplement (PMC2853561; doi:10.1371/journal.pone.0010118), 2010-04-12

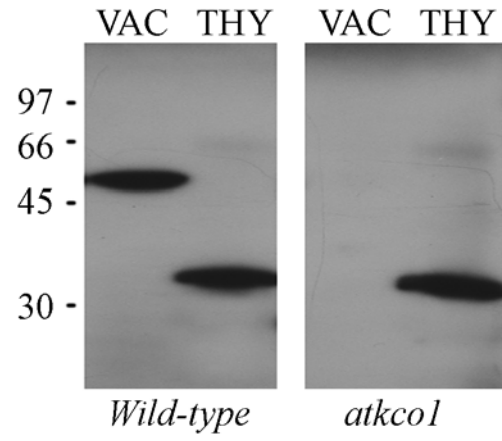

Supplement: pone.0010118.s011.pdf [file pone.0010118.s011.pdf]
