# Supplementary material for: A Novel Potassium Channel in Photosynthetic Cyanobacteria
Source: PubMed Central journal article supplement (PMC2853561; doi:10.1371/journal.pone.0010118), 2010-04-12

|           |           |          |                                        |
|-----------|-----------|----------|----------------------------------------|
| At4g01840 | HYSGIETHP | -----V-- | VDALYFCIVTMCTIGYGDIAPLTPWTKIFAVV       |
| At1g02510 | QFSGTETNL | -----F-- | VDAFYFSIVTFSTVGYGDIVPSTSTTKILTIV       |
| At4g18160 | HYVVNQTHP | -----V-- | VDGLYFCIVTMCTIGYGDITPNSVVTKLFSIM       |
| At5g46370 | SYNVKQTHP | -----V-- | VDALYFCIVTMCTIGYGDITPDSVVTKLFSIF       |
| At5g55630 | QISGHKTSG | -----V-- | VDALYFCIVTMTTVGYGDLVPNSSASRLLACA       |
| SynK      | SYIISPTNF | NELQSDGI | NNFILLYFSFTTLTTLGYGDITPTDSIAMGLSNM     |
| cons      | *         | .        | . : ** . : . * : * : * * * * : . * : : |

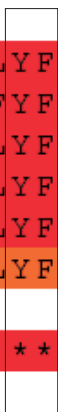

Supplement: pone.0010118.s012.pdf [file pone.0010118.s012.pdf]
